# Supplementary material
Source: ML conference proceedings conference paper supplement (https://openreview.net/forum?id=zt5sQ7j8WXm)
Supplement: supplementary_material [file attachment]

## A BACKGROUND

**Off-policy RL with Soft Actor-Critic.** The Soft Actor-Critic (SAC) (Haarnoja et al., 2018) is a leading off-policy RL algorithm. Like other off-policy RL methods, such as DQN Mnih et al. (2015) or DDPG Lillicrap et al. (2016), SAC optimizes a Q function but does so based on the maximum entropy framework for RL Ziebart (2010). In addition to maximizing the reward function, SAC also maximizes the policy entropy which leads to improved exploration and helps prevent overfitting. As an actor-critic method, SAC optimizes both the actor’s policy by maximizing a value function as well as a critic with a Bellman loss. The actor’s parameters are updated to maximize the Q function and policy entropy which is encapsulated by the following equation:

$$\mathcal{L}_{\text{actor}}^{\text{SAC}} = \mathbb{E}_{s_t \sim \mathcal{B}, a_t \sim \pi_{\theta_1}} \left[ \alpha \log \pi_{\theta_1}(a_t | s_t) - Q_{\theta_2}(s_t, a_t) \right]. \quad (1)$$

Here,  $(s_t, a_t)$  are state-action pairs,  $\mathcal{B}$  is a replay buffer,  $\theta_1$  is the actor’s parameters,  $\theta_2$  are the critic’s parameters, and  $\alpha$  is a scalar value that control the entropy strength. The policy  $\pi_{\theta_1}$  is parametrized by a multi-variate Gaussian with a diagonal covariance matrix and outputs the means and standard deviations that are then used to sample actions from the Gaussian distribution. To update the critic’s parameters, SAC optimizes a soft Q function by minimizing the soft Bellman loss:

$$\mathcal{L}_{\text{critic}}^{\text{SAC}} = \mathbb{E}_{\tau_t} \left[ (Q_{\theta_2}(s_t, a_t) - R_t - \gamma [Q_{\bar{\theta}_2}(s_t, a_t) - \alpha \log \pi_{\theta_1}(a_t | s_t)])^2 \right], \quad (2)$$

where  $\tau_t = (s_t, a_t, s_{t+1}, R_t)$  is a single timestep transition,  $\bar{\theta}$  denotes the Polyak averaging of the critic’s parameters, and  $\alpha$  is a temperature parameter.

## B IMPLEMENTATION DETAILS

### B.1 REGULARIZE SAC BY PRIOR

$$\mathcal{L}_{\text{actor}}^{\text{SAC}} = \mathbb{E}_{z_t \sim \mathcal{B}, a_t \sim \pi_{\theta_1}} \left[ \alpha D_{KL}(\pi_{\theta_1}(a_t | z_t), p_a(z_t | s_t)) - Q_{\theta_2}(z_t, a_t) \right]. \quad (3)$$

$$\mathcal{L}_{\text{critic}}^{\text{SAC}} = \mathbb{E}_{\tau_t} \left[ (Q_{\theta_2}(s_t, a_t) - R_t - \gamma [Q_{\bar{\theta}_2}(z_t, a_t) - \alpha D_{KL}(\pi_{\theta_1}(a_t | z_t), p_a(z_t | s_t))])^2 \right], \quad (4)$$

where  $p_a(z_t | s_t)$  is the prior distribution learned from offline dataset

### B.2 HYPERPARAMETERS

Because we built off of SPiRL (Pertsch et al., 2020), we used the same set of hyperparamters for skill extraction and online RL training. The reward model learning from human preference has the same hyperparamters as in PEBBLE. (Lee et al., 2021).

| Hyperparameters for Skill Extraction | Value           |
|--------------------------------------|-----------------|
| Skill Horizon                        | 10              |
| Ensemble Size                        | 3               |
| Hidden Units                         | 200             |
| Non-linearity                        | ReLU            |
| Optimizer                            | Adam            |
| Learning Rate                        | 0.001           |
| Weight Decay                         | 0.0001          |
| $(\beta_1, \beta_2)$                 | (.9, .999)      |
| Hyperparameters for Skill Execution  | Value           |
| Query Batch Size                     | 128             |
| Query Frequency                      | 100,000         |
| Segment Size                         | 5               |
| Sampling Scheme                      | Entropy Exploit |

NEW

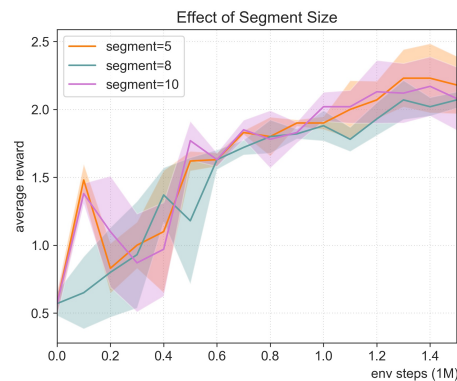

Figure 1: The plot compares SkiP with different segment size over the Kettle-Burner-Cab environment. Lines and shaded area represent mean and standard error over three seeds, respectively.

## C EFFECT OF SEGMENT SIZE

As shown in Fig 1, unlike PEBBLE (Lee et al., 2021), we did not find segment size to affect our method’s performance.

## REFERENCES

- Tuomas Haarnoja, Aurick Zhou, Pieter Abbeel, and Sergey Levine. Soft actor-critic: Off-policy maximum entropy deep reinforcement learning with a stochastic actor. In *International Conference on Machine Learning*, 2018.
- Kimin Lee, Laura Smith, and Pieter Abbeel. Pebble: Feedback-efficient interactive reinforcement learning via relabeling experience and unsupervised pre-training. *arXiv preprint arXiv:2106.05091*, 2021.
- Timothy P Lillicrap, Jonathan J Hunt, Alexander Pritzel, Nicolas Heess, Tom Erez, Yuval Tassa, David Silver, and Daan Wierstra. Continuous control with deep reinforcement learning. In *International Conference on Learning Representations*, 2016.
- Volodymyr Mnih, Koray Kavukcuoglu, David Silver, Andrei A Rusu, Joel Veness, Marc G Bellemare, Alex Graves, Martin Riedmiller, Andreas K Fidjeland, Georg Ostrovski, et al. Human-level control through deep reinforcement learning. *Nature*, 518(7540):529–533, 2015.
- Karl Pertsch, Youngwoon Lee, and Joseph J. Lim. Accelerating reinforcement learning with learned skill priors. In *Conference on Robot Learning (CoRL)*, 2020.
- Brian D Ziebart. Modeling purposeful adaptive behavior with the principle of maximum causal entropy. 2010.
